1 **The aerobiology of SARS-CoV-2 in UK hospitals and the impact of aerosol generating**  
2 **procedures**

3 Susan Gould<sup>1\*</sup>, Rachel L Byrne<sup>1\*</sup>, Thomas Edwards<sup>1</sup>, Ghaith Aljayyousi<sup>1</sup>, Dominic Wooding<sup>1</sup>,  
4 Kate Buist<sup>1</sup>, Konstantina Kontogianni<sup>1</sup>, Allan Bennett<sup>2</sup>, Barry Atkinson<sup>2</sup>, Ginny Moore<sup>2</sup>, Jake  
5 Dunning<sup>3</sup>, Stacy Todd<sup>4</sup>, Marie-Claire Hoyle<sup>4</sup>, Lance Turtle<sup>5</sup>, Tom Solomon<sup>4,5,6,7</sup>, Richard  
6 Fitzgerald<sup>5</sup>, Mike Beadsworth<sup>4</sup>, Paul Garner<sup>1</sup>, Emily R Adams<sup>1</sup>, and Tom Fletcher<sup>1,4</sup>

7 <sup>1</sup>Liverpool School of Tropical Medicine, Liverpool, UK.

8 <sup>2</sup>UK Health Security Agency

9 <sup>3</sup>University of Oxford

10 <sup>4</sup>Liverpool University Hospitals NHS Foundation Trust

11 <sup>5</sup>University of Liverpool

12 <sup>6</sup>National Institute for Health Research Health Protection Research Unit in Emerging and  
13 Zoonotic Infections, Institute of Infection, Veterinary and Ecological Sciences, University of  
14 Liverpool

15 <sup>7</sup>The Walton Centre NHS Foundation Trust

16 \*authors contributed equally

17 **Running title: SARS-CoV-2 aerosols in AGP rooms (max 50 characters)**

18 **Sources of funding:** SG, EA, JD, LT, TS and TF are supported by the National Institute for Health  
19 Research (NIHR) Health Protection Research Unit in Emerging and Zoonotic Infections. SG and  
20 PG are supported by the READ-It (project number 300342-104) which is funded by UK aid from  
21 the UK government. PhD stipend from the medical research council to RLB.

22 **Conflicts of Interest:** Emily Adams is Director of Epidemics and NTDs at Global Access diagnostics.

23 **Corresponding author:** Rachel L Byrne, Liverpool School of Tropical Medicine, Pembroke Place,  
24 Liverpool UK. E-mail: [Rachel.byrne@lstm.ac.uk](mailto:Rachel.byrne@lstm.ac.uk) phone number: 01517053100

25 **Keywords:** COVID-19, aerobiology, Aerosol generating procedure

26 **Word count:** Abstract, 250; Manuscript, 3047

27 **Authors' contributions:** The study was conceived by ERA, RLB, TF and SG. The study design was  
28 developed by ERA, BA, AB, RLB, TE, TF, SG and GM. Data collection and extraction was  
29 conducted by RLB, SG, MH. Laboratory work was completed by KB, RLB, SG, KK and DW. Data  
30 analysis and interpretation were conducted by GA, BA, MB, AB, RLB, JD, TE, RF, TF, PG, SG, GM,  
31 TS, ST, LT and DW. The initial manuscript was prepared by GA, RLB and SG. All authors edited  
32 and approved the final manuscript.

33 **Abstract (250 words)**

34 Background

35 SARS-CoV-2 nosocomial transmission to patients and healthcare workers (HCWs) has occurred  
36 throughout the COVID-19 pandemic. Aerosol generating procedures (AGPs) seemed particularly  
37 risky, and policies have restricted their use in all settings. We examined the prevalence of  
38 aerosolized SARS-CoV-2 in the rooms of COVID-19 patients requiring AGP or supplemental  
39 oxygen compared to those on room air.

40 Methods

41 Samples were collected prospectively near to adults hospitalised with COVID-19 at two tertiary  
42 care hospitals in the UK from November 2020 – October 2021. The Sartorius MD8 AirPort air  
43 sampler was used to collect air samples at a minimum distance of 1.5 meters from patients. RT-  
44 qPCR was used following overnight incubation of membranes in culture media and extraction.

45 Results

46 We collected 219 samples from patients' rooms: individuals on room air (n=67) , receiving  
47 oxygen (n=65) or AGP (n=67). Of these, 54 (24.6%) samples were positive for SARS-CoV-2 viral  
48 RNA. The highest prevalence was identified in the air around patients receiving oxygen (32.3%,  
49 n=21, CI95% 22.2 to 44.3%) with AGP and room air recording prevalence of (20.7%, n=18,  
50 CI95% 14.1 – 33.7%) and (22.3%, n=15, CI95% 13.5 – 30.4%) respectively. We did not detect a  
51 significant difference in the observed frequency of viral RNA between interventions.

52 Interpretation

53 SARS-CoV-2 viral RNA was detected in the air of hospital rooms of COVID-19 patients, and AGPs  
54 did not appear to impact the likelihood of viral RNA. Enhanced respiratory protection and  
55 appropriate infection prevention and control measures are required to be fully and carefully  
56 implemented for all COVID-19 patients to reduce risk of aerosol transmission.

## 57 **Background**

58 Since the emergence of the severe acute respiratory syndrome coronavirus (SARS-CoV-2) in  
59 2019 there have been intense efforts to understand the natural history of COVID-19 disease  
60 and transmission characteristics. The risk of nosocomial transmission has been well reported  
61 and personal protective equipment (PPE) requirements for healthcare workers (HCWs) has  
62 generated significant discussion internationally<sup>1</sup>. The World Health Organization (WHO)  
63 recently estimated that between 80 000 and 180 000 HCWs have died of COVID-19 up to May  
64 2021<sup>2</sup>.

65 Aerosol generating procedures (AGPs) such as non-invasive ventilation (NIV) have been  
66 considered essential in providing respiratory support for patients with severe COVID-19 and in  
67 reducing the need for invasive ventilation which is associated with higher morbidity and  
68 mortality, others such as High Flow oxygen have now been shown to offer no benefit in  
69 comparison with conventional oxygen<sup>3-5</sup>. Despite improved patient outcomes, AGPs came  
70 under increased scrutiny during the severe acute respiratory syndrome (SARS) outbreak of  
71 2003, when observational data suggested AGPs increased the risk of healthcare workers (HCW)  
72 acquiring infection<sup>6</sup>. Hesitancy in adopting NIV, high flow oxygen or performing other AGPs may  
73 be attributable to perceived risk to HCWs or limited availability of resources thought to be pre-  
74 requisite such as negative pressure ventilation and higher-grade PPE<sup>7</sup>. In addition, there is a  
75 lack of consensus as to what classes as an AGP and international guidelines (such as WHO, the  
76 Centers for Disease Control (CDC) or UK Health Security Agency (UK HSA)) are based on expert  
77 opinion due to a lack of solid evidence base.

78 Air sampling studies in healthcare settings have reported a broad range of frequencies of  
79 detection of SARS-CoV-2. Multi-centre environmental sampling performed by UK HSA in 2020  
80 in 8 UK hospitals identified SARS-CoV-2 RNA in 4 of 55 air samples collected <1m from patients<sup>8</sup>.  
81 Other studies have reported rates of 0-72%<sup>9,10</sup> PCR positivity in air samples. More recent  
82 environmental sampling within the RECOVERY-RS (Randomised Evaluation of COVID-19  
83 Therapy, Respiratory Support) study included air samples collected during administration of  
84 continuous positive airways pressure (CPAP), high flow nasal oxygen (HFNO) and supplemental

85 oxygen. Of 90 air samples from 30 patients 14% were positive for at least one target on PCR and  
86 no statistical difference in frequency of positivity was identified between the three groups  
87 (CPAP, HFNO and other oxygen)<sup>11</sup>. In healthy volunteers, two studies have demonstrated that  
88 coughing, speaking or heavy breathing generate significantly higher volumes of detectable  
89 respiratory particles than use of CPAP or HFNO<sup>12,13</sup>.

90 However, confirmation of the significance of SARS-CoV-2 in the air in hospitalised settings has  
91 not been definitive due to the absence of routine air sampling in a prospective COVID-19  
92 patient cohort, with the WHO calling for further studies on the risk of SARS-CoV-2 release  
93 during AGPs<sup>7</sup>. A range of approaches have been adopted to investigate the relative risk of  
94 aerosol transmission in comparison to other modes like fomite, direct contact or close-range  
95 droplet<sup>14</sup>. Further, there is a recognized need to identify which precautions would be most  
96 effective in mitigating risks, to better protect communities and healthcare services including  
97 vulnerable patients and staff.

98 This study addresses the question of whether there is an increased likelihood of detecting  
99 aerosolized SARS-CoV-2 RNA in the rooms of COVID-19 patients undergoing AGPs than in the  
100 rooms of patients requiring oxygen at flow rates of less than 15L/min via mask or nasal  
101 cannulae, or not requiring any supplemental oxygen. For the purposes of this study, AGPs are  
102 defined as those listed by UKHSA for which specific guidance on infection prevention and  
103 control (IPC) measures is provided in the UK (UKHSA 2022)<sup>15</sup> (Figure 1).

104 **Figure 1: List of procedures defined as aerosol generating procedures (UKHSA)**

- 105 • \*Tracheal intubation and extubation
- 106 • Manual ventilation
- 107 • Tracheotomy or tracheostomy procedures (insertion or removal)
- 108 • \*Bronchoscopy
- 109 • Dental procedures (using high speed devices, for example ultrasonic scalers/high speed drills)
- 110 • \*Non-invasive ventilation (NIV); bi-level positive airway pressure ventilation (BiPAP) and continuous  
111 positive airway pressure ventilation (CPAP)
- 112 • \*High flow nasal oxygen (HFNO)
- 113 • High frequency oscillatory ventilation (HFOV)
- 114 • Induction of sputum using nebulised saline
- 115 • Respiratory tract suctioning
- 116 • Upper ear, nose, and throat (ENT) airway procedures that involve respiratory suctioning

- 117 • \*Upper gastro-intestinal endoscopy where open suction of the upper respiratory tract occurs beyond the  
118 oro-pharynx  
119 • High speed cutting in surgery/post-mortem procedures if respiratory tract/paranasal sinuses involved

120 \*indicates procedures included in this study

## 121 **Methods (781)**

### 122 **Setting**

123 Liverpool University Hospitals NHS Foundation Trust have two acute tertiary referral hospital  
124 sites within Liverpool, UK (Royal Liverpool University (RLUH) and Aintree University Hospitals  
125 (AUH)) that have each managed large cohorts of COVID-19 patients. CPAP, non-invasive  
126 ventilation and use of high-flow oxygen were rapidly adopted as therapeutic interventions in  
127 Liverpool<sup>16</sup> but are listed as AGPs. AGPs were conducted in areas with enhanced ventilation,  
128 including pre-existing negative pressure rooms, newly installed temporary systems providing  
129 ventilation or areas such as theatre or intensive care. Together with UK-HSA, who had already  
130 undertaken air and environmental sampling in hospitals<sup>8</sup> we continued to collect air samples  
131 from the rooms of patients hospitalised with COVID-19.

132 Prospective air sampling was performed around inpatients with a recent diagnosis of SARS CoV-  
133 2 and in community ambulatory cases (n=13) admitted to the clinical research unit for  
134 screening or treatment as part of an early phase trial. Samples included in this interim analysis  
135 were collected between November 2020 and October 2021, and the dominant circulating  
136 variants in the UK during this period were B.1.1.7 Alpha (PANGO lineage B.1.1.7) and Delta  
137 (PANGO lineage B.1.617.2)<sup>17</sup>. Locations sampled include high dependency units, NIV units,  
138 critical care units, infectious diseases, respiratory and general wards, and emergency departments.  
139 No additional biological samples or clinical information were collected from the patients whose  
140 rooms was sampled. No changes to behaviour or clinical care were requested from staff or  
141 patients during sampling periods, staff and patients were aware that sampling was taking place.  
142 Samples were categorised as either 1) room samples; patients not undergoing any respiratory  
143 treatment 2) oxygen; patients undergoing oxygen at flow rates of less than 15L/min via nasal  
144 cannulae/mask or 3) AGP; patients undergoing an AGP.

## 145 **Sample collection and processing**

146 To collect air samples, we used the Sartorius MD8 AirPort portable air sampler with gelatin  
147 membranes (Sartorius, Germany). To ensure aerosols were captured and to minimize the  
148 collection of large droplets, the sampler was placed at approximately 1.5 meters<sup>18</sup> and the  
149 sampler faced away from the participant. When sampling at a participant's bedside, the  
150 sampler was typically placed on a hospital chair or table. At each sampling timepoint 1000L of  
151 air was collected at a flow rate of 40 L/min.

152 Once completed the gelatin membrane was removed from the sampler using clean gloves, and  
153 placed in a sterile 50ml Falcon tube (Corning Science, United States). Samples were transported  
154 to the Biological Safety level 3 (BSL3) laboratories at the Liverpool School of Tropical Medicine  
155 within 2 hours of sample collection. The gelatin membranes were immediately suspended in  
156 10ml Dulbecco's modified Eagle's medium (DMEM) with 10% fetal bovine solution (FBS; both  
157 ThermoFisher, USA) and 50 units per ml of penicillin/streptomycin (Gibco, US). Samples were  
158 vortexed and then stored overnight at 4°C to allow the membrane to fully dissolve without  
159 impacting the stability of SARS-CoV-2<sup>19</sup>.

## 160 **RNA extraction, PCR and cell culture**

161 Following overnight storage, samples were brought to room temperature by incubation for up  
162 to two hours. 140µl (1.4%) of each sample was then taken for RNA extraction. Viral RNA was  
163 extracted using the QIAamp viral RNA mini kit (Qiagen, Germany) following the manufacturer's  
164 instructions with an internal RT-qPCR extraction control incorporated before the lysis stage  
165 (ThermoFisher, USA). Once extracted samples were taken immediately for downstream  
166 application and stored at 4°C during PCR setup.

167 For SARS-CoV-2 RT-qPCR detection, 10µl of extracted RNA was tested using the TaqPath™  
168 COVID-19 CE-IVD RT-PCR assay (ThermoFisher, USA) that detects three different SARS-CoV-2  
169 genomic regions (ORF1ab, N gene, S gene), on the QuantStudio 5 platform (ThermoFisher,  
170 USA). The PCR was deemed to be positive if one SARS-CoV-2 target and the internal control  
171 amplified, this differs from the manufacturer instructions whereby two SARS-CoV-2 targets

172 must amplify however this is for clinical samples rather than for environmental samples. We do  
173 not infer viability of the viral RNA we detected and thus the presence/absence of viral RNA is  
174 recorded here. In instances of low Ct values the third target can often be out competed and  
175 thus viral load calculations have not been appropriate using this assay. Samples were negative if  
176 only the internal extraction control amplified.

177 Cell culture was attempted using a methodology adapted from Edwards *et al*<sup>20</sup>. For samples  
178 identified as the Alpha variant, based on S gene deletion, a 5-day incubation post inoculation  
179 was used due to the variant's slower growth rate and smaller plaque sizes in Vero E6 cells<sup>21</sup>.  
180 For all other samples a 3-day post inoculation incubation was utilized, as is routine laboratory  
181 procedure. After three passage events, samples were fixed with 10% formalin, stained using  
182 crystal violet and visually inspected for viral plaques.

### 183 **Statistical Analysis**

184 All data handling and manipulation was performed through R 3.6.3<sup>22</sup>. Binomial generalized  
185 linear models (GLM) were performed to assess the ability of procedure to detect a positive  
186 result, with time since infection, cycle threshold (Ct) value and location of patient included as  
187 co-variates. Chi-Square test was performed to estimate the effect of procedure on detecting a  
188 positive result in isolation from other factors. Additionally one-way ANOVA tests were  
189 performed to assess quantitative differences between Ct values among different methods for  
190 each gene.

### 191 **Ethics and Approvals**

192 This study was performed in conjunction with UK HSA as part of the COVID-19 clinical response.  
193 In line with UK Health Resource Authority guidance this was performed as a service evaluation  
194 and consisted of environmental sampling and simplified and anonymized routinely collected  
195 patient information. The environmental sampling process was explained to patients and verbal  
196 consent obtained.

### 197 **Results (450)**



198 A total of 219 air samples were collected during this study from bed spaces of 199 individuals  
199 (with some patient sampled at more than one timepoint) either on room air only (n=67),  
200 receiving supplemental oxygen (n=65) or undergoing an AGP (n=87) (Table 1).

201 **Table 1: Procedures sampled, and frequency of positive results observed**

| Aerosol generating procedures  |                        | Non-aerosol generating procedures |                        |
|--------------------------------|------------------------|-----------------------------------|------------------------|
| Procedure                      | percent positive (n/N) | Procedure                         | percent positive (n/N) |
| CPAP hood or mask              | 19.2% (10/52)          | Room air                          | 24.6% (17/69)          |
| BiPAP                          | 0% (0/3)               | Oxygen - Nasal cannulae           | 28.6% (8/28)           |
| Hi Flow oxygen (mask or nasal) | 14.3% (3/21)           | Oxygen – Venturi mask             | 33.3% (9/27)           |
| Intubation                     | 100.0% (1/1)           | Oxygen – NRB                      | 20.0% (1/5)            |
| Bronchoscopy                   | 100.0% (2/2)           | Other/Not known                   | 75% (3/4)              |
| Endoscopy                      | 50.0% (1/2)            |                                   |                        |
| All                            | 20.9% (17/81)          |                                   | 28.6% (38/133)         |

202 CPAP Continuous positive airway pressure. BiPAP Bilevel Positive Airway Pressure.  
203 NRB Non-rebreathe.  
204

205 The median number of days since onset of symptoms was 7 (Table 2). In total, 24.7% (n=55,  
206 CI95% 19.4-30.8%) were positive for SAR-CoV-2 viral RNA (Appendix 1). The highest prevalence  
207 was identified in the air around patients who were receiving oxygen (32.3%, n=21, CI95% 22.2  
208 to 44.3%) with AGP and room air recording prevalence of 20.7% (n=18, CI95% 14.1 – 33.7%) and  
209 22.3% (n=15, CI95% 13.5 – 30.4%) respectively, as shown in figure 2. The likelihood of a sample  
210 being PCR positive was not influenced by procedure (GLM, p >0.05).

211 **Table 2: Number of days between onset of symptoms and sample collection within each group**

|                                               | AGP       | Oxygen   | Room air | All     |
|-----------------------------------------------|-----------|----------|----------|---------|
| Median number of days since onset of symptoms | 10 (1-27) | 7 (0-42) | 5 (1-12) | 7(0-42) |
| Onset of symptoms unknown                     | 5         | 2        | 1        | 8       |
| Asymptomatic                                  | 2         | 1        | 17       | 20      |

212 AGP Aerosol generating procedure.

213 We did not detect a difference in Ct values for positive samples between procedure ( $p>0.05$ ,  
214 one-way ANOVA), shown in figure 3. We observed a reduced detection of S gene, indicative of  
215 Alpha variant presence, compared to other RT-qPCR genomic targets (ORF1 and N gene). Mean  
216 Ct values for AGPs, Oxygen and Room air were 32.18, 33.08 and 33.88 respectively and cell  
217 culture for each sample was negative.

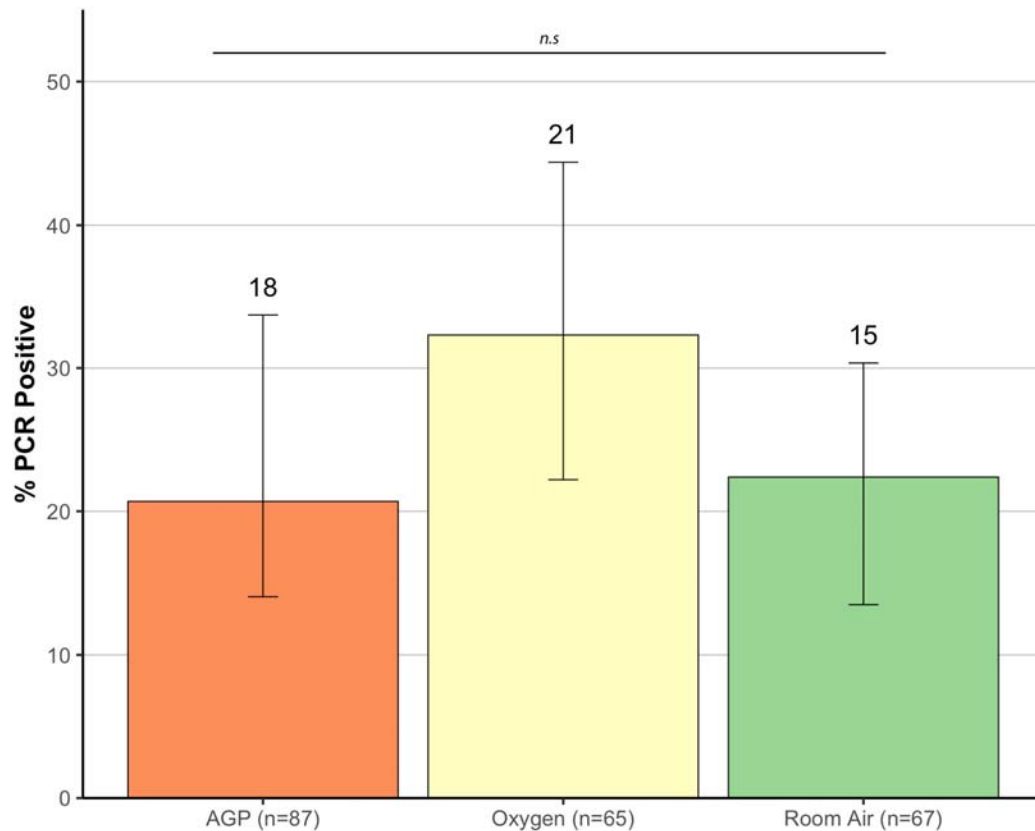

218

219 **Figure 2: The percentage of samples PCR positive for SARS-CoV-2 viral RNA collected from the rooms of PCR**  
220 **positive patients in two Liverpool Hospitals.** There was no statistically significant difference between aerosol  
221 generating procedures (AGP), oxygen or room air and the likelihood of detecting viral RNA (GLM,  $p>0.05$ ). N.s.  
222 indicates no statistical difference between the three methods (one-way ANOVA,  $p>0.05$ ).

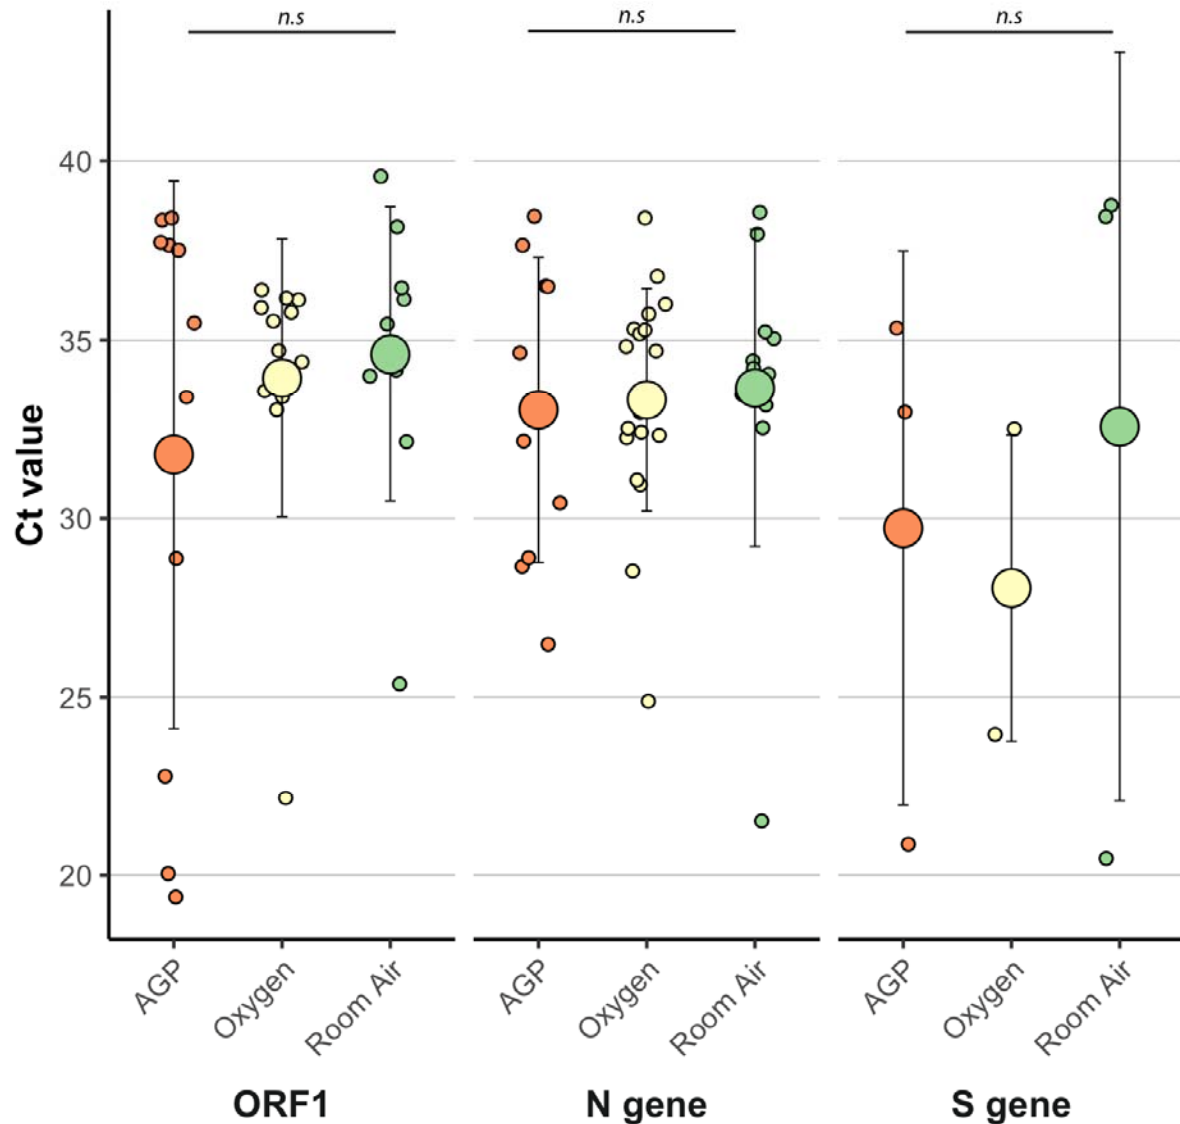

223

224 **Figure 3: The cycle threshold (Ct) value of SARS-CoV-2 positive samples for each procedure (aerosol generating**  
225 **procedure and oxygen) and room air.** The PCR used utilize three distinct regions of the SARS-CoV-2 genome  
226 (ORF1, Nucleocapsid (N) gene and spike (S) gene). It is important to note that the alpha variant has significant  
227 mutations in the s gene is not detectable, resulting in fewer data points. N.s. indicates no statistical difference  
228 between the three methods for each gene (one-way ANOVA,  $p > 0.05$ ).

229 We did not detect an effect of the number of days since reported onset of symptoms and the  
230 frequency of detection of viral RNA or Ct values (GLM,  $P > 0.05$ ). Further, no association  
231 between RT-qPCR results and sampling location e.g., emergency department or critical care unit  
232 was identified (GLM,  $p > 0.05$ ). Of note, there was no obvious difference in positive results for

233 the Oxygen or Room air groups when sampling in standard ventilation areas rather than  
234 enhanced ventilation areas (RR in Oxygen group 1.22, RR in Room Air group 1.08) (Table 3).

235 **Table 3: Type of ventilation, estimated air changes (ACH) and frequency of observed positive PCR results in each**  
236 **group**

| Type of ventilation | Estimated air changes | Intervention |       |               |
|---------------------|-----------------------|--------------|-------|---------------|
|                     |                       | Oxygen       | AGP   | Room air only |
| Neutral pressure    | 6                     | 9/25         | 0/0   | 8/39          |
| Negative Pressure   | 12                    | 10/34        | 15/66 | 4/21          |
| Unknown             |                       | 2/6          | 0/3   | 0/2           |
| ITU/Theatre         | 10                    | 0/0          | 3/12  | 0/0           |

237 ITU Intensive Therapy Unit, AGP Aerosol generating procedure

238 An additional 16 air samples were taken in areas either occupied or used by patients with  
239 confirmed SARS-CoV-2 infection (e.g. bathroom, nursing station), or directly adjacent i.e.  
240 considered to be at risk of contamination (appendix 1), SARS-CoV-2 RNA was detected in 5 of  
241 these. Culture was negative, and fungal overgrowth was noted in the bathroom samples. Of 4  
242 samples collected in shared patient bathrooms 2 were RNA positive, as were 2 of 8 collected at  
243 nursing stations, the remaining positive sample was collected in an ITU bay. Five of the nursing  
244 station samples were from stations within 'red' zones, 1 from an area adjacent to a red zone,  
245 and 2 from ward nursing stations more than 3 metres from COVID-19 patient rooms with  
246 separating doors. The Ct values of these 5 samples ranged from 22.4 (S gene) at a nursing  
247 station where sample was positive for all 3 genes tested, to 35.19 (for only one gene) for the  
248 second positive nursing station sample and patient bathrooms. The positive sample collected in  
249 a COVID-19 bay (with the nearest patient intubated) was positive for N gene and ORF1 genes.

## 250 Discussion

251 The factors that facilitate nosocomial transmission of SARS-CoV-2 remain incompletely  
252 understood, including any additional risks posed by AGPs. To improve understanding and  
253 inform IPC recommendations we have undertaken the largest air sampling study for SARS-Cov-2  
254 published to date. In this report we provide evidence for the presence of SARS-CoV-2 viral RNA  
255 isolated from the air of clinical environments in UK hospitals. In line with previous reports<sup>23,24</sup>,  
256 we found Ct values to be high (typically above 30), indicative of low viral loads present. We did

257 not record any significant difference in the observed frequency of viral RNA detection nor viral  
258 load between different procedures being undertaken including AGPs. Interestingly, we did  
259 observe higher positivity rates in individuals receiving oxygen (flow rates of less than 15L/min  
260 via nasal cannulae) than either AGP patients or those without supplementary oxygen although  
261 not statistically significant.

262 The viral dynamics of SARS-CoV-2 in human disease is now well reported with higher viral loads  
263 and transmission risk predominantly occurring earlier in disease course. Commonly used AGPs  
264 such as CPAP are usually required later in the clinical course with median time from onset of  
265 symptoms to development of respiratory failure being 8-12 days<sup>28</sup>. However, we did not see a  
266 significant relationship between time since symptom onset and likelihood of viral RNA  
267 detection. Infective SARS-CoV-2 virus is rarely identified from clinical samples beyond 9 days  
268 from onset of symptoms<sup>26</sup> and thereby chances of capturing viable virus may be confounded.  
269 We were unable to culture samples, likely due to the high Ct values observed, dilutional effect  
270 and due to the challenges in culturing virus after potential desiccation during the methods of air  
271 sampling. Two reports describe the isolation of infectious SARS-CoV-2 from air sampling.  
272 Lednicky *et al* describe isolation of SARS-CoV-2 virus from hospital rooms used by 2 patients  
273 and a vehicle occupied by an infected individual with sequencing of cultured virus matching  
274 that of the cases sampled<sup>27,28</sup>. Another challenge in isolating virus from air samples was  
275 identified by Lednicky *et al* as another respiratory virus was found to potentially overgrow  
276 SARS-CoV-2 in culture<sup>27</sup>. Santarpia *et al* described cytopathic effect (CPE), suggested increase in  
277 RNA titre on days 3 and 4 of culture and presence of viral proteins on immunofluorescent  
278 staining in 1 air sample but could not confirm cultivation of virus<sup>24</sup>. Published aerobiology  
279 studies in healthcare settings use a wide array of methods such as filtering air through gelatin,  
280 PTFE or PC membranes, using liquid cyclonic sampling such as the Coriolis (Bertin), or impaction  
281 e.g., Anderson samplers (Appendix 2). Sampling distances from specified patients sampled  
282 varied from 10cm to 3m. Lednicky *et al* utilised a water condensation collection method (VIVAS)  
283 and Santarpia the Sartorius MD8 airport sampler with gelatin membrane filters<sup>24,27</sup>. The  
284 diversity of study design and equipment as well as processing and analytical methods presents  
285 challenges in comparing the results of different studies. Less than 10 air sampling studies

286 identified through literature search have reported attempted cell culture<sup>10,11,27,29-31</sup>, and the  
287 majority have been unable to confirm presence of viable virus despite detection of SARS CoV-2  
288 RNA through PCR<sup>11,29,31</sup>. This is likely attributable to the insensitivity of cell culture, which  
289 requires a large inoculum and represents an imperfect model of infection of the human  
290 nasopharynx. These challenges are increased when considering environmental samples with  
291 low concentrations of detectable viral RNA and the degree of dilution involved in air sampling  
292 methods including our own.

293 It is now accepted that a spectrum of expelled sizes of respiratory particles exist with risk of  
294 infection dependent on additional key factors. These include variables relating to the person  
295 (e.g., symptoms, duration of illness, individual variation in respiratory particle dispersion) and  
296 those related to place (e.g., ventilation, proximity to susceptible individuals) that may be  
297 equally or more important than the procedures undertaken. As this was a pragmatic  
298 environmental sampling study, detailed patient level data and correlation with clinical SARS  
299 CoV-2 samples was not available. This is a recognized limitation as individual characteristics and  
300 the viral load detectable on clinical samples may impact likelihood of detection of viral RNA or  
301 viable virus in the environment. AGPs were conducted in negative pressure single rooms, pods  
302 or bays and bronchoscopy or endoscopy in designated facilities in accordance with Health  
303 Technical memorandum 03-01 (including minimum 10 air changes per hour). Those on room air  
304 or oxygen were more commonly cared for in rooms with neutral pressure. We also recognise  
305 that multiple factors affect the potential impact of infective aerosols including temperature,  
306 humidity and ventilation, patient and staff behaviour and pre-existing natural or vaccine  
307 mediated immunity.

308 This study adds to the data of air sampling studies conducted within hospitals caring for COVID-  
309 19 patients and offers reassurances to HCW performing AGPs that the presence of SARS-CoV-2  
310 in the air is no different compared with environments where no AGPs are taking place. Our data  
311 supports the conclusions drawn from the recent exploratory air sampling study conducted on  
312 30 participants within the RECOVERY RS trial in which CPAP, HFNO and supplementary oxygen

313 via venturi were compared. The observed frequency of detection was not significantly higher in  
314 the AGP groups<sup>11</sup>.

315 Internationally differing lists of AGPs have been produced e.g. including or excluding nebulized  
316 therapies or cardiopulmonary resuscitation. In the UK the expert panel responsible for  
317 formulating such a list assessed the available evidence as ‘poor quality’<sup>15</sup>. AGPs vary widely and  
318 more sampling around a broader range of procedures is required to establish whether there is  
319 any evidence of increased risk associated. Any reduction in protections for potentially  
320 vulnerable staff or patients regarding AGPs would require more certainty which could only be  
321 provided by a more comprehensive evidence base. As we move towards endemicity of COVID-  
322 19, it remains imperative to protect HCW and vulnerable patients from nosocomial infections.  
323 Appropriate PPE and mask use are essential as SARS-CoV-2 is frequently detectable in the air  
324 surrounding positive patients. We believe our data supports the use of FFP2/3 medical masks  
325 for HCWs caring for COVID-19 patients, particularly for those with prolonged contact in line  
326 with HSE guidelines<sup>15</sup>. As we move forwards, we must continue to avoid oversimplifying the  
327 transmission dynamics of SARS-CoV-2 including into ‘droplet vs aerosol’, as this can lead to  
328 fixed IPC recommendations and must now appreciate that the ‘person, place and procedure’  
329 influence transmission risk. Future recommendations must be guided by emerging evidence  
330 including ongoing studies to identify transmission differences that may occur with new variants  
331 of concern.

### 332 **Role of the funding source**

333 The study funders had no influence over the design, conduct, analysis and interpretation of the  
334 study; nor the writing of the report and the decision to submit the paper for publication.

335 **References**

- 336 1 Thomas JP, Srinivasan A, Wickramarachchi CS, Dhesi PK, Hung YMA, Kamath A V.  
337 Evaluating the national PPE guidance for NHS healthcare workers during the COVID-19  
338 pandemic. *Clin Med J R Coll Physicians London* 2020; **20**: 242–7.
- 339 2 World Health Organisation. Health and Care Worker Deaths during COVID-19. 2021.  
340 [https://www.who.int/news/item/20-10-2021-health-and-care-worker-deaths-during-](https://www.who.int/news/item/20-10-2021-health-and-care-worker-deaths-during-covid-19)  
341 [covid-19](https://www.who.int/news/item/20-10-2021-health-and-care-worker-deaths-during-covid-19) (accessed Oct 21, 2021).
- 342 3 Wozniak DR, Rubino A, Tan AL, *et al.* Positive role of continuous positive airway pressure  
343 for intensive care unit patients with severe hypoxaemic respiratory failure due to COVID-  
344 19 pneumonia: A single centre experience. *J Intensive Care Soc* 2022; **23**: 27–33.
- 345 4 Ashish A, Unsworth A, Martindale J, *et al.* CPAP management of COVID-19 respiratory  
346 failure: A first quantitative analysis from an inpatient service evaluation. *BMJ Open Respir*  
347 *Res* 2020; **7**: e000692.
- 348 5 Perkins GD, Ji C, Connolly BA, *et al.* Effect of Noninvasive Respiratory Strategies on  
349 Intubation or Mortality among Patients with Acute Hypoxemic Respiratory Failure and  
350 COVID-19: The RECOVERY-RS Randomized Clinical Trial. *JAMA - J Am Med Assoc* 2022;  
351 **327**: 546–58.
- 352 6 Judson SD, Munster VJ. Nosocomial transmission of emerging viruses via aerosol-  
353 generating medical procedures. *Viruses*. 2019; **11**. DOI:10.3390/v11100940.
- 354 7 Diaz, Janet; Appiah, John; Askie, Lisa; Baller, April; Banerjee, Anshu; Barkley, Shannon;  
355 Bertagnolio, Silvia; Hemmingsen, Bianca; Bonet, Mercedes; Cunningham J. COVID-19:  
356 Clinical management Living guidance. 2021  
357 <https://www.who.int/publications/i/item/WHO-2019-nCoV-clinical-2021-1> (accessed  
358 Sept 6, 2021).
- 359 8 Moore G, Rickard H, Stevenson D, *et al.* Detection of SARS-CoV-2 within the healthcare



- 360 environment: a multi-centre study conducted during the first wave of the COVID-19  
361 outbreak in England. *J Hosp Infect* 2021; **108**: 189–96.
- 362 9 Li YH, Fan YZ, Jiang L, Wang HB. Aerosol and environmental surface monitoring for SARS-  
363 CoV-2 RNA in a designated hospital for severe COVID-19 patients. *Epidemiol Infect* 2020.  
364 DOI:10.1017/S0950268820001570.
- 365 10 Ang AXY, Luhung I, Ahidjo BA, *et al.* Airborne SARS-CoV-2 surveillance in hospital  
366 environment using high-flowrate air samplers and its comparison to surface sampling.  
367 *Indoor Air* 2021; : 1–10.
- 368 11 Winslow RL, Zhou J, Windle EF, *et al.* SARS-CoV-2 environmental contamination from  
369 hospitalised patients with COVID-19 receiving aerosol-generating procedures. *Thorax*  
370 2021; : thoraxjnl-2021-218035.
- 371 12 Wilson NM, Marks GB, Eckhardt A, *et al.* The effect of respiratory activity, non-invasive  
372 respiratory support and facemasks on aerosol generation and its relevance to COVID-19.  
373 *Anaesthesia* 2021; **76**: 1465–74.
- 374 13 Hamilton FW, Gregson F, Arnold DT, *et al.* Aerosol emission from the respiratory tract: an  
375 analysis of relative risks from oxygen delivery systems. *medRxiv* 2021; :  
376 2021.01.29.21250552.
- 377 14 Nissen K, Krambrich J, Akaberi D, *et al.* Long-distance airborne dispersal of SARS-CoV-2 in  
378 COVID-19 wards. *Sci Rep* 2020; **10**: 1–9.
- 379 15 UKHSA. Infection prevention and control for seasonal respiratory infections in health and  
380 care settings (including SARS-CoV-2) for winter 2021 to 2022. Updated 17 January 2022.  
381 2022. [https://www.gov.uk/government/publications/wuhan-novel-coronavirus-](https://www.gov.uk/government/publications/wuhan-novel-coronavirus-infection-prevention-and-control/covid-19-guidance-for-maintaining-services-within-health-and-care-settings-infection-prevention-and-control-recommendations#transmission-based-precautions)  
382 [infection-prevention-and-control/covid-19-guidance-for-maintaining-services-within-](https://www.gov.uk/government/publications/wuhan-novel-coronavirus-infection-prevention-and-control/covid-19-guidance-for-maintaining-services-within-health-and-care-settings-infection-prevention-and-control-recommendations#transmission-based-precautions)  
383 [health-and-care-settings-infection-prevention-and-control-](https://www.gov.uk/government/publications/wuhan-novel-coronavirus-infection-prevention-and-control/covid-19-guidance-for-maintaining-services-within-health-and-care-settings-infection-prevention-and-control-recommendations#transmission-based-precautions)  
384 [recommendations#transmission-based-precautions.](https://www.gov.uk/government/publications/wuhan-novel-coronavirus-infection-prevention-and-control/covid-19-guidance-for-maintaining-services-within-health-and-care-settings-infection-prevention-and-control-recommendations#transmission-based-precautions)

- 385 16 Nightingale R, Nwosu N, Kutubudin F, *et al.* Is continuous positive airway pressure (CPAP)  
386 a new standard of care for type 1 respiratory failure in COVID-19 patients? A  
387 retrospective observational study of a dedicated COVID-19 CPAP service. *BMJ Open*  
388 *Respir Res* 2020; **7**: 8–10.
- 389 17 Hadfield J, Megill C, Bell SM, *et al.* NextStrain: Real-time tracking of pathogen evolution.  
390 *Bioinformatics* 2018; **34**: 4121–3.
- 391 18 World Health Organization. Modes of transmission of virus causing COVID-19:  
392 implications for IPC precaution recommendations. *Geneva World Heal Organ* 2020; : 19–  
393 21.
- 394 19 Chin AWH, Chu JTS, Perera MRA, *et al.* Stability of SARS-CoV-2 in different environmental  
395 conditions. *The Lancet Microbe* 2020; **1**: e10.
- 396 20 Edwards T, Kay GA, Aljanyoussi G, *et al.* SARS-CoV-2 Transmission Risk from sports  
397 Equipment (STRIKE). *medRxiv* 2021; : 2021.02.04.21251127.
- 398 21 Jeong GU, Yoon GY, Moon HW, *et al.* Comparison of plaque size, thermal stability, and  
399 replication rate among SARS-CoV-2 variants of concern. *Viruses* 2022; **14**: 4–8.
- 400 22 R Core Team. R: A language and environment for ## statistical computing. 2017.
- 401 23 Chia PY, Coleman KK, Tan YK, *et al.* Detection of air and surface contamination by SARS-  
402 CoV-2 in hospital rooms of infected patients. *Nat Commun* 2020; **11**.  
403 DOI:10.1038/s41467-020-16670-2.
- 404 24 Santarpia JL, Rivera DN, Herrera VL, *et al.* Aerosol and surface contamination of SARS-  
405 CoV-2 observed in quarantine and isolation care. *Sci Rep* 2020; **10**. DOI:10.1038/s41598-  
406 020-69286-3.
- 407 25 Li X, Ma X. Acute respiratory failure in COVID-19: Is it ‘typical’ ARDS? *Crit Care* 2020; **24**:  
408 1–5.

- 409 26 Cevik M, Kuppalli K, Kindrachuk J, Peiris M. Virology, transmission, and pathogenesis of  
410 SARS-CoV-2. *BMJ* 2020; **371**: 1–6.
- 411 27 Lednicky JA, Lauzard M, Fan ZH, *et al.* Viable SARS-CoV-2 in the air of a hospital room  
412 with COVID-19 patients. *Int J Infect Dis* 2020; **100**: 476–82.
- 413 28 Lednicky JA, Lauzardo M, Alam MM, *et al.* Isolation of SARS-CoV-2 from the air in a car  
414 driven by a COVID patient with mild illness. *Int J Infect Dis* 2021; **108**: 212–6.
- 415 29 Zhou J, Otter JA, Price JR, *et al.* Investigating Severe Acute Respiratory Syndrome  
416 Coronavirus 2 (SARS-CoV-2) Surface and Air Contamination in an Acute Healthcare  
417 Setting During the Peak of the Coronavirus Disease 2019 (COVID-19) Pandemic in  
418 London. *Clin Infect Dis* 2021; **73**: e1870–7.
- 419 30 Binder RA, Alarja NA, Robie ER *et al.* Environmental and aerosolized severe acute  
420 respiratory syndrome coronavirus 2 among hospitalized coronavirus disease 2019  
421 patients. *J Infect Dis* 2020; **222**: 1798–806.
- 422 31 Dumont-Leblond N, Veillette M, Mubareka S, *et al.* Low incidence of airborne SARS-CoV-  
423 2 in acute care hospital rooms with optimized ventilation. *Emerg Microbes Infect* 2020; **9**:  
424 2597–605.
- 425
- 426

## 427 **Research in Context**

### 428 **Evidence before this study**

429 We searched Pubmed (Medline, Web of science (Science citation index-Expanded and Biosis)  
430 and Embase for air sampling studies published between January 2020 and November 2021.  
431 Selected search terms were “COVID-19”, “SARS-Cov-2”, “air sampler”, “indoor air quality”,  
432 “bioaerosol” and “indoor airborne” with 326 results. Studies in which healthcare environments  
433 occupied by SARS-CoV-2 infected humans were sampled were eligible. After screening of  
434 abstracts and then full texts 37 papers were included.

435 Frequency of detection of viral RNA in air samples collected from COVID-19 patients varied  
436 widely from 0% to 100% and factors affecting likelihood of positivity were not consistently  
437 identified. Whilst isolation of infectious virus from air samples is not always attempted, it has  
438 only been reported twice but this reflect the challenges of fragile virus capture. Laboratory  
439 studies have demonstrated that SARS-CoV-2 may persist for several hours in airborne particles,  
440 and epidemiological research has illustrated probable airborne transmission of COVID-19 in  
441 settings such as restaurants. Observational data from the SARS-CoV-1 epidemic suggested that  
442 aerosol generating procedures (AGPs) presented a greater transmission hazard than other care,  
443 that required enhanced respiratory protection. Winslow et al recently reported that in a cohort  
444 of 30 patients, that AGPs were not associated with increased likelihood of SARS-CoV-2 viral RNA  
445 detection in air compared to supplemental oxygen use. Studies of aerosol generation from  
446 procedures such as CPAP and high flow oxygen on healthy volunteers in controlled  
447 environments had predicted a low risk of airborne transmission related to such procedures in  
448 comparison to cough, speech or singing.

### 449 **Added value of this study**

450 As the largest study to date to investigate SARS CoV-2 RNA detection in air samples from rooms  
451 of patients undergoing different interventions including AGPS this study contributes  
452 significantly to the limited evidence base in this area. We demonstrated that there was no  
453 greater frequency of detection of SARS-CoV-2 from the environment of patients undergoing  
454 AGPs compared to those on room air or oxygen. This suggests that the risk of aerosol  
455 transmission may be equally significant in all areas where COVID-19 patients are cared for and

456 appropriate respiratory precautions should be recommended. This important evidence can  
457 provide data to support infection prevention and control guidance in health care settings and  
458 inform risk assessments and the use of AGPs in all settings.

459

460 **Implications of all available evidence**

461 SARS CoV-2 virus has been identified in the air in a range of healthcare settings where COVID-19  
462 patients are managed. Our findings in combination with those reported by Winslow et al  
463 suggest that AGPs do not present a uniformly increased transmission risk. Increased  
464 understanding of the natural history of COVID-19 and transmission characteristics of SARS-CoV-  
465 2, promote a move from the binary categories of AGP vs non-AGP for respiratory protection,  
466 towards a risk assessment based primarily on the Patient and Place, as opposed to just the  
467 procedure.

468 Appendix 1: Details of positive samples

469

470 Positive samples - procedure, ventilation and Ct values

| Ventilation: Negative pressure (ets. 12 ACH), Neutral or standard ward ventilation (est 6 ACH), ITU and theatre (est. 10 ACH) | Procedure: narrower categories | PCR result | N gene   | S gene   | ORF1     |
|-------------------------------------------------------------------------------------------------------------------------------|--------------------------------|------------|----------|----------|----------|
| Negative                                                                                                                      | High flow                      | Positive   | Negative | 20.87    | Negative |
| Negative                                                                                                                      | CPAP                           | Positive   | 32.16    | Negative | 38.35    |
| Negative                                                                                                                      | CPAP                           | Positive   | 26.48    | 35.34    | 20.05    |
| Neutral                                                                                                                       | Room air                       | Positive   | Negative | 38.76    | 25.37    |
| Neutral                                                                                                                       | Room air                       | Positive   | 37.96    | Negative | 38.16    |
| ITU                                                                                                                           | CPAP                           | Positive   | Negative | Negative | 37.65    |
| Negative                                                                                                                      | Nasal cannulae                 | Positive   | 34.83    | Negative | Negative |
| Negative                                                                                                                      | Room air                       | Positive   | 34.43    | 38.45    | 32.14    |
| Negative                                                                                                                      | CPAP                           | Positive   | 38.46    | Negative | Negative |
| Neutral                                                                                                                       | rebreath mask                  | Positive   | 28.53    | Negative | Negative |
| Neutral                                                                                                                       | Room air                       | Positive   | 33.17    | Negative | Negative |
| Neutral                                                                                                                       | Nasal cannulae                 | Positive   | 33.03    | Negative | Negative |
| Neutral                                                                                                                       | Room air                       | Positive   | 34.05    | negative | 34.16    |
| Neutral                                                                                                                       | Venturi mask                   | Positive   | 32.25    | Negative | 34.71    |
| Neutral                                                                                                                       | Nasal cannulae                 | Positive   | 36.78    | Negative | 36.13    |
| Neutral                                                                                                                       | Nasal cannulae                 | Positive   | 32.32    | Negative | Negative |
| Neutral                                                                                                                       | NK                             | Positive   | 34.7     | Negative | 35.91    |
| Negative                                                                                                                      | CPAP                           | Positive   | Negative | Negative | 37.51    |
| Negative                                                                                                                      | CPAP                           | Positive   | Negative | Negative | 22.79    |
| Negative                                                                                                                      | Venturi mask                   | Positive   | 35.31    | Negative | Negative |
| Neutral                                                                                                                       | NK                             | Positive   | 32.52    | Negative | 33.04    |
| Negative                                                                                                                      | Nasal cannulae                 | Positive   | 30.94    | 23.96    | 33.57    |
| Negative                                                                                                                      | CPAP                           | Positive   | Negative | Negative | 33.4     |
| Theatre                                                                                                                       | Endoscopy                      | Positive   | Negative | 32.97    | 19.39    |
| Negative                                                                                                                      | Nasal cannulae                 | Positive   | negative | 27.7     | Negative |
| Negative                                                                                                                      | Intubation                     | Positive   | 28.66    | Negative | 28.88    |
| Negative                                                                                                                      | CPAP                           | Positive   | 28.9     | Negative | Negative |
| Negative                                                                                                                      | Venturi mask                   | Positive   | 24.89    | 32.5     | 22.17    |
| NK                                                                                                                            | Nasal cannulae                 | Positive   | Negative | Negative | 33.41    |
| Neutral                                                                                                                       | Room air                       | Positive   | Negative | 20.47    | Negative |
| Neutral                                                                                                                       | Room air                       | Positive   | 38.57    | Negative | Negative |
| Neutral                                                                                                                       | Room air                       | Positive   | 33.47    | Negative | 36.14    |
| Negative                                                                                                                      | CPAP                           | Positive   | 34.65    | Negative | Negative |
| Negative                                                                                                                      | NK                             | Positive   | 35.73    | Negative | Negative |
| NK                                                                                                                            | Venturi mask                   | Positive   | 35.18    | Negative | Negative |
| Negative                                                                                                                      | CPAP                           | Positive   | 37.65    | negative | negative |
| Negative                                                                                                                      | Venturi mask                   | Positive   | 38.41    | Negative | 36.17    |
| Neutral                                                                                                                       | Room air                       | Positive   | 35.05    | Negative | 35.45    |
| Negative                                                                                                                      | Room air                       | Positive   | 35.24    | negative | negative |
| Negative                                                                                                                      | High flow                      | Positive   | 36.52    | negative | negative |
| Negative                                                                                                                      | High flow                      | Positive   | 36.5     | negative | negative |
| Neutral                                                                                                                       | Room air                       | Positive   | 32.53    | negative | negative |
| Neutral                                                                                                                       | Room air                       | Positive   | Negative | Negative | 36.46    |
| Theatre                                                                                                                       | Bronchoscopy                   | Positive   | negative | negative | 38.41    |
| Theatre                                                                                                                       | Bronchoscopy                   | Positive   | negative | negative | 37.73    |
| Negative                                                                                                                      | Room air                       | Positive   | 34.21    | negative | negative |
| Negative                                                                                                                      | Room air                       | Positive   | 21.52    | Negative | 39.57    |
| Negative                                                                                                                      | Room air                       | Positive   | negative | negative | 34       |
| Negative                                                                                                                      | Venturi mask                   | Positive   | 35.29    | Negative | 35.78    |
| Neutral                                                                                                                       | Venturi mask                   | Positive   | 31.07    | Negative | 35.54    |
| Negative                                                                                                                      | CPAP                           | Positive   | 30.43    | Negative | 35.48    |
| Negative                                                                                                                      | Venturi mask                   | Positive   | 36.01    | Negative | 36.4     |
| Neutral                                                                                                                       | Nasal cannulae                 | Positive   | 32.41    | Negative | 34.4     |
| Negative                                                                                                                      | Venturi mask                   | Positive   | 32.96    | Negative | Negative |

471

472 NK Not known CPAP Continuous positive airway pressure

473

474 **Details of samples from other areas**

| Ventilation: Negative pressure (est. 12 ACH), Neutral or standard ward ventilation (est. 6 ACH), ITU and theatre (est. 10 ACH) | Setting           | Area directly occupied or used by SARS CoV-2 infected patients | PCR result | N gene   | S gene   | ORF1     |
|--------------------------------------------------------------------------------------------------------------------------------|-------------------|----------------------------------------------------------------|------------|----------|----------|----------|
| ITU                                                                                                                            | Intubated patient | Yes                                                            | Positive   | 34.07    | Negative | 34.6     |
| Neutral                                                                                                                        | Bathroom          | Yes                                                            | Negative   | Negative | Negative | Negative |
| Neutral                                                                                                                        | Bathroom          | Yes                                                            | Positive   | Negative | Negative | 33.39    |
| Neutral                                                                                                                        | Bathroom          | Yes                                                            | Positive   | 34.89    | Negative | Negative |
| Neutral                                                                                                                        | Bathroom          | Yes                                                            | Negative   | Negative | Negative | Negative |
| Negative                                                                                                                       | Nurses station    | Yes                                                            | Negative   | Negative | Negative | Negative |
| Negative                                                                                                                       | Nurses station    | Yes                                                            | Negative   | Negative | Negative | Negative |
| Negative                                                                                                                       | Near air vent     | No                                                             | Negative   | Negative | Negative | Negative |
| Negative                                                                                                                       | Nurses station    | No                                                             | Positive   | 23.72    | 22.4     | 33.57    |
| Negative                                                                                                                       | Centre of bay     | No                                                             | Negative   | Negative | Negative | Negative |
| Negative                                                                                                                       | Centre of bay     | No                                                             | Negative   | Negative | Negative | Negative |
| Negative                                                                                                                       | Nurses station    | Yes                                                            | Negative   | Negative | Negative | Negative |
| Negative                                                                                                                       | Nurses station    | Yes                                                            | Negative   | Negative | Negative | Negative |
| Negative                                                                                                                       | Nurses station    | Yes                                                            | Negative   | Negative | Negative | Negative |
| Negative                                                                                                                       | Nurses station    | No                                                             | Negative   | Negative | Negative | Negative |
| Negative                                                                                                                       | Nurses station    | No                                                             | Positive   | 35.19    | negative | negative |

475

476

477 Appendix 2: Review of previous air sampling studies

478 Summary of previous air sampling studies in healthcare settings which included details of

|           | Number of samples, individuals (if applicable) and results of PCR and culture (if applicable) |              |                                  |                                                   |                         |                                    | AGPs and PCR               |                                |
|-----------|-----------------------------------------------------------------------------------------------|--------------|----------------------------------|---------------------------------------------------|-------------------------|------------------------------------|----------------------------|--------------------------------|
| Country   | No. samples                                                                                   | No. patients | Air samples PCR positive/suspect | Proportion patients with $\geq 1$ positive sample | Culture attempted (Y/N) | Evidence of viable virus described | Description of AGPs        | Proportion PCR positive (AGPs) |
| UK (refs) | 4                                                                                             | 4            | 2/4                              | NK                                                | Y                       | N                                  | Tracheostomy (3), HFNO (1) | 2 (4)                          |
| USA       | 15                                                                                            | 15           | 0/15                             | 0(15)                                             | N                       | N                                  | BiPAP (2), HFNO (3)        | 0(5)                           |
| Israel    | 4                                                                                             | NK           | 1/4                              | n/a                                               | N                       | N                                  | >1 patient on high flow    | 1(1)                           |
| S Korea   | 6                                                                                             | 3            | 0/6                              | 0(3)                                              | N                       | N                                  | HFNO (1)                   | 0(1)                           |
| Hong Kong | 6                                                                                             | 6            | 0/6                              | 0(6)                                              | N                       | N                                  | HFNO (1)                   | 0(1)                           |
| China     | 12                                                                                            | 12           | 1/12                             | 1(12)                                             | N                       | N                                  | intubation                 | 1(1)                           |
| UK        | 90                                                                                            | 30           | 14/90                            | 9 (30)                                            | Y                       | N                                  | HFNO (30), CPAP (30)       | 9(60)                          |

479 sampling around aerosol generating procedures (AGPs)

480 PCR polymerase chain reaction, NK not known, n/a not applicable, HFNO high flow nasal

481 oxygen, CPAP continuous, AGP Aerosol generating procedure

482



It is made available under a [CC-BY-NC-ND 4.0 International license](https://creativecommons.org/licenses/by-nc-nd/4.0/) .

483 **Summary of air sampling conducted** 1) around specified numbers of SARS-CoV-2 infected patients, 2)  
 484 around unspecified numbers of infected patients and 3) in areas not occupied by COVID-19 patients  
 485 from studies where infected patients were also sampled

|                                                                |                    |                                                                 | Number of samples, individuals (if applicable) and results of PCR and culture (if applicable) |                  |                 |                                                   |                                             |                         |                                    |   |  |
|----------------------------------------------------------------|--------------------|-----------------------------------------------------------------|-----------------------------------------------------------------------------------------------|------------------|-----------------|---------------------------------------------------|---------------------------------------------|-------------------------|------------------------------------|---|--|
|                                                                |                    |                                                                 | Country                                                                                       | No. samples      | No. patients    | Proportion air samples PCR positive/suspect (all) | Proportion patients with ≥1 positive sample | Culture attempted (Y/N) | Evidence of viable virus described |   |  |
| Sampling around specified number of COVID-19 infected patients | Hospital or clinic | Ong 2020                                                        | Singapore                                                                                     | 6                | 3               | 0 (6)                                             | 0 (3)                                       | N                       | N                                  |   |  |
|                                                                |                    | Semelka 2021                                                    | USA                                                                                           | 78               | 26              |                                                   | 0 (26)                                      | N                       | N                                  |   |  |
|                                                                |                    | Ong 2021                                                        | Singapore                                                                                     | 12               | 19              | 6 (12)                                            | NK                                          | Y                       | N                                  |   |  |
|                                                                |                    | Wei 2020                                                        | China                                                                                         | 34               | 9               | 0 (34)                                            | 0/9                                         | N                       | N                                  |   |  |
|                                                                |                    | Binder 2020                                                     | USA                                                                                           | 195              | 20              | 3 (195)                                           | 3 (20)                                      | Y                       | N                                  |   |  |
|                                                                |                    | Guo 2020                                                        | China                                                                                         | 48               | 39              | 15 (48)                                           | NK                                          | N                       | N                                  |   |  |
|                                                                |                    | Lednický 2020                                                   | USA                                                                                           | 4                | 2               | 4 (4)                                             | NK                                          | Y                       | Y                                  |   |  |
|                                                                |                    | Faridi 2020                                                     | Iran                                                                                          | 10               | 44              | 0 (10)                                            | NK (0)                                      | N                       | N                                  |   |  |
|                                                                |                    | Dumont-Leblond                                                  | Canada                                                                                        | 100              | 22              | 11 (100)                                          | 6 (22)                                      | Y                       | N                                  |   |  |
|                                                                |                    | Dubey 2021                                                      | India                                                                                         | 24               | 12              | 17 (24)                                           | 12 (12) at 1m, 5                            | N                       | N                                  |   |  |
|                                                                |                    | Chia 2020                                                       | Singapore                                                                                     | 22 pooled into 4 | 3               | 2 (4)                                             | 2 (3)                                       | N                       | N                                  |   |  |
|                                                                |                    | Bokharaei-Salim                                                 | Iran                                                                                          | 14               | 16              | 0 (14)                                            | NK                                          | N                       | N                                  |   |  |
|                                                                |                    | Baboli 2021                                                     | Iran                                                                                          | 29               | 25              | 4 (29)                                            | NK                                          | N                       | N                                  |   |  |
|                                                                |                    | Santarpia 2020                                                  | USA                                                                                           | 19               | 11              | 11 (19)                                           | 8 (11)                                      | Y                       | Y                                  |   |  |
|                                                                |                    | Razzini 2020                                                    | Italy                                                                                         | 2                | 3               | 2 (2)                                             | NK                                          | N                       | N                                  |   |  |
|                                                                |                    | Li 2020                                                         | China                                                                                         | 14               | 9               | 2 (14)                                            | 1 (9)                                       | N                       | N                                  |   |  |
|                                                                |                    | Lei 2020                                                        | China                                                                                         | 36               | 20              | 0 (36)                                            | NK                                          | N                       | N                                  |   |  |
|                                                                |                    | Jin 2021                                                        | China                                                                                         | 1                | 1               | 1 (1)                                             | 1 (1)                                       | N                       | N                                  |   |  |
|                                                                |                    | Quarantine facility or hotel                                    | Ong 2021                                                                                      | Singapore        | 9               | 90                                                | 1 (9)                                       | NK                      | Y                                  | N |  |
|                                                                | Ben-Shmuel 2021    |                                                                 | Israel                                                                                        | 1                | 1               | 1 (1)                                             | 1 (1)                                       | N                       | N                                  |   |  |
| Sampling around unspecified number of COVID-19 patients        | Hospital/clinic    | Zhou 2020                                                       | UK                                                                                            | 22               | n/a             | 11 (22)                                           | n/a                                         | Y                       | N                                  |   |  |
|                                                                |                    | Yuan 2020                                                       | China                                                                                         | 32               | n/a             | 0 (32)                                            | NK                                          | N                       | N                                  |   |  |
|                                                                |                    | Lednický 2020                                                   | USA                                                                                           | 2                | NK              | 1 (2)                                             | n/a                                         | Y                       | Y                                  |   |  |
|                                                                |                    | Li 2020                                                         | China                                                                                         | 36               | NK              | 0 (36)                                            | n/a                                         | N                       | N                                  |   |  |
|                                                                |                    | Masoumbégi 2020                                                 | Iran                                                                                          | 30               | NK              | 0 (30)                                            | NK                                          | N                       | N                                  |   |  |
|                                                                |                    | Kenarkoohi 2020                                                 | Iran                                                                                          | 11               | NK              | 2 (11)                                            | NK                                          | N                       | N                                  |   |  |
|                                                                |                    | Hernandez 2021                                                  | Mexico                                                                                        | 10               | n/a             | 3 (10)                                            | NK                                          | N                       | N                                  |   |  |
|                                                                |                    | Yuan 2020                                                       | China                                                                                         | 11               | n/a             | 8 (11)                                            | NK                                          | N                       | N                                  |   |  |
|                                                                |                    | Ang 2021                                                        | Singapore                                                                                     | 27               | NK (wards full) | 13 (27)                                           | NK                                          | Y                       | N                                  |   |  |
|                                                                |                    | Barbieri 2021                                                   | Italy                                                                                         | 6                | NK              | 3 (6)                                             | NK                                          | N                       | N                                  |   |  |
|                                                                |                    | Dubey 2021                                                      | India                                                                                         | 6                | NK              | 5 (6)                                             | NK                                          | N                       | N                                  |   |  |
|                                                                |                    | Hemati 2021                                                     | Iran                                                                                          | 35               | NK              | 5 (35)                                            | NK                                          | N                       | N                                  |   |  |
|                                                                |                    | Grimalt 2021                                                    | Spain                                                                                         | 11               | NK              | 11 (11)                                           | NK                                          | N                       | N                                  |   |  |
|                                                                |                    | Sampling in areas not directly occupied by infected individuals | Hospital/clinic or quarantine facility                                                        | Ong 2020         | Singapore       | 4                                                 | n/a                                         | 0 (4)                   |                                    |   |  |
|                                                                |                    |                                                                 |                                                                                               | Zhou 2020        | UK              | 5                                                 | n/a                                         | 1 (5)                   |                                    |   |  |
| Yuan 2020                                                      | China              |                                                                 |                                                                                               | 58               | n/a             | 0 (58)                                            |                                             |                         |                                    |   |  |
| Li 2020                                                        | China              |                                                                 |                                                                                               | 99               | n/a             | 0 (99)                                            |                                             |                         |                                    |   |  |
| Masoumbégi 2020                                                | Iran               |                                                                 |                                                                                               | 1                | n/a             | 0 (1)                                             |                                             |                         |                                    |   |  |
| Guo 2020                                                       | China              |                                                                 |                                                                                               | 66               | n/a             | 1 (66)                                            |                                             |                         |                                    |   |  |
| Kenarkoohi 2020                                                | Iran               |                                                                 |                                                                                               | 3                | n/a             | 0 (3)                                             |                                             |                         |                                    |   |  |
| Lane 2021                                                      | USA                |                                                                 |                                                                                               | 528              | n/a             | 0 (528)                                           |                                             |                         |                                    |   |  |
| Tan 2020                                                       | China              |                                                                 |                                                                                               | 17               | n/a             | 0 (17)                                            |                                             |                         |                                    |   |  |
| Ben-Shmuel 2021                                                | Israel             |                                                                 |                                                                                               | 1                | n/a             | 0 (1)                                             |                                             |                         |                                    |   |  |
| Hemati 2021                                                    | Iran               |                                                                 |                                                                                               | 10               | n/a             | 1 (10)                                            |                                             |                         |                                    |   |  |
| Grimalt 2021                                                   | Spain              |                                                                 |                                                                                               | 36               | n/a             | 21 (36)                                           |                                             |                         |                                    |   |  |
| Baboli 2021                                                    | Iran               |                                                                 |                                                                                               | 22               | n/a             | 2 (22)                                            |                                             |                         |                                    |   |  |
| Dubey 2021                                                     | India              |                                                                 |                                                                                               | 12               | n/a             | 0 (12)                                            |                                             |                         |                                    |   |  |
| Yuan 2020                                                      | China              |                                                                 |                                                                                               | 24               | n/a             | 14 (24)                                           |                                             |                         |                                    |   |  |
| Santarpia 2020                                                 | USA                |                                                                 |                                                                                               | 16               | n/a             | 11 (16)                                           |                                             |                         |                                    |   |  |
| Razzini 2020                                                   | Italy              |                                                                 |                                                                                               | 3                | n/a             | 0 (3)                                             |                                             |                         |                                    |   |  |
| Jin 2020                                                       | China              |                                                                 |                                                                                               | 1                | n/a             | 0 (1)                                             |                                             |                         |                                    |   |  |
| Lei 2020                                                       | China              | 99                                                              | n/a                                                                                           | 0 (99)           |                 |                                                   |                                             |                         |                                    |   |  |
